# Supplementary material for: Post-transcriptional regulation of CD83 expression by AUF1 proteins
Source: PubMed Central journal article supplement — Nucleic Acids Res. 2012 Nov 17;41(1):206–19. doi: 10.1093/nar/gks1069 (PMC3592417; doi:10.1093/nar/gks1069), 2012-11-17
Supplement: supp_gks1069_nar-01703-x-2012-File008.pdf [file supp_gks1069_nar-01703-x-2012-File008.pdf]

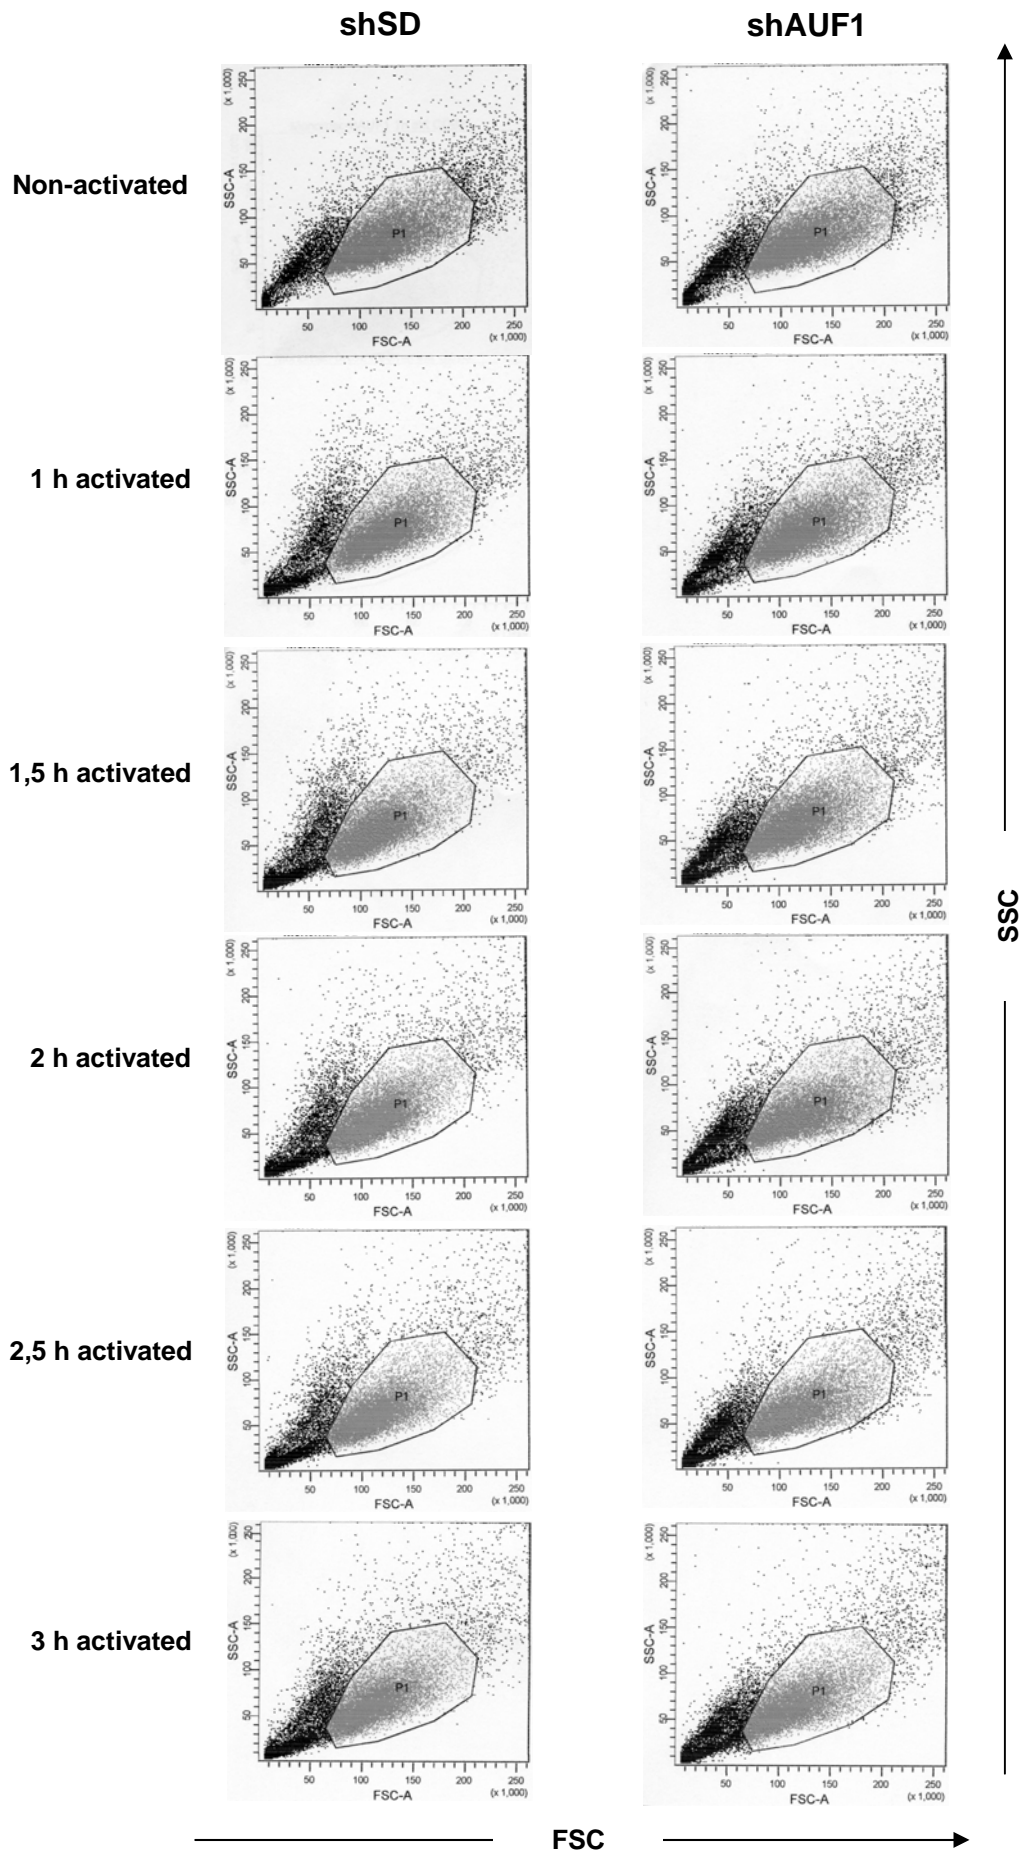

**Supplemental Figure S1.** From the samples of experiment shown in Figure 6 (knock down of AUF1 attenuates endogenous CD83 expression in a mononuclear cell line at the posttranscriptional level) the related forward (FSC)/sideward (SSC) scatter plots are depicted to present evidence of cellular maintenance.
