# Supplementary material for: Post-transcriptional regulation of CD83 expression by AUF1 proteins
Source: PubMed Central journal article supplement — Nucleic Acids Res. 2012 Nov 17;41(1):206–19. doi: 10.1093/nar/gks1069 (PMC3592417; doi:10.1093/nar/gks1069), 2012-11-17
Supplement: supp_gks1069_nar-01703-x-2012-File009.pdf [file supp_gks1069_nar-01703-x-2012-File009.pdf]

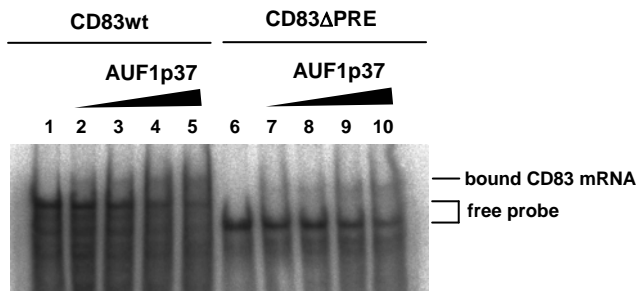

**Supplemental Figure S2.**

Wildtype full length CD83 mRNA as well as CD83 $\Delta$ PRE mRNA was incubated with increasing amounts of AUF1p37 (lanes 1, 6: 1000 ng GST; lanes 2-5, 7-10: 100; 300; 700; 1000 ng of recombinant GST-tagged AUF1p37 protein). Binding of the proteins was evaluated by RNA gel shift experiments.
